# Supplementary material
Source: PubMed Central journal article supplement (PMC3835143)
Supplement: gim201372x1.pdf [file gim201372x1.pdf]

**Table S1.** Summary of eMERGE-II Activities at Each Site

| Institution                                                   | Aim 1                                                                                                                                                                                                         | Aim 2                                                                                                                                             | Aim 3                                                                                                                                                                                                                      | Aim 4                                                                                                                                                               | Aim 5                                                           |
|---------------------------------------------------------------|---------------------------------------------------------------------------------------------------------------------------------------------------------------------------------------------------------------|---------------------------------------------------------------------------------------------------------------------------------------------------|----------------------------------------------------------------------------------------------------------------------------------------------------------------------------------------------------------------------------|---------------------------------------------------------------------------------------------------------------------------------------------------------------------|-----------------------------------------------------------------|
| Cincinnati Children's Hospital and Boston Children's Hospital | Demonstrate real-time execution of phenotypic selection across two distinct pediatric institutions with disparate EMR systems as a model for ensuring phenotypic standardization and for national scalability | Contribute to phenotype selection and perform GWAS and PheWAS                                                                                     | Use return of <i>COMT</i> and <i>CYP2D6</i> research results to explore parents' responses to and use of their children's results and understand factors that influence their decisions about learning incidental findings | Explore clinicians' perceptions of pharmacogenetic research results after EMR integration                                                                           |                                                                 |
| Children's Hospital of Philadelphia                           | Adapt eMERGE phenotype algorithms relevant to pediatric cohorts with circulating lipid levels as the primary phenotype                                                                                        | Define novel phenotypes with relevance to adult and pediatric cohorts (asthma, ADHD, atopic dermatitis, and GERD)                                 | Conduct GWAS with minimal risks to patient privacy from sharing of EMR data                                                                                                                                                | Develop consent and community consultation procedures for conducting research                                                                                       | Begin incorporating genomic research results into clinical care |
| Geisinger Clinic                                              | Identify genetic variants associated with AAA, extreme obesity, and related conditions                                                                                                                        | Incorporate genomic data into clinical care, using EMR-based CDS                                                                                  | Identify sociocultural concerns of patients in rural areas regarding return of genetic findings. Provide patient and physician education                                                                                   |                                                                                                                                                                     |                                                                 |
| Group Health                                                  | Study infectious disease susceptibility (BuGWAS), specifically susceptibility to <i>Clostridium difficile</i> , reactivation of the varicella zoster virus, and fungal nail infection (onychomycosis)         | Investigate the relationship of chromosomal abnormalities (ChroWAS) identified by GWAS with bone marrow disorders                                 | Assess challenges of integrating genomic data into clinical care: interview medical system leaders, focus groups with physicians and patients, and develop and test prototype                                              | Collaborate within and extend eMERGE through exchange of knowledge, technology, and best practices for generating EMR-based GWAS and integrating with clinical care |                                                                 |
| Marshfield Clinic Research Foundation                         | Develop and validate electronic algorithms and efficacy of medical therapy for ophthalmic conditions                                                                                                          | Undertake genetic discoveries for ophthalmic conditions and pharmacogenetics                                                                      | Consultat with the general community and clinicians related to the incorporation of GWAS results into EMR                                                                                                                  |                                                                                                                                                                     |                                                                 |
| Mayo Clinic                                                   | Identify genetic variants for inter-individual variation in cardio-respiratory fitness, and susceptibility to VTE and CHF using validated and transportable                                                   | Quantify genetic risk of CHD and statin myopathy. Develop risk communication tools with clinical and genetic components to both patients and care | Develop informatics approaches to incorporate genomic information and relevant clinical decision support tools into the EMR                                                                                                | Conduct a randomized-clinical trial to investigate how patients respond to genotype-informed CHD risk                                                               |                                                                 |

|                                                                                                 |                                                                                                                                                  |                                                                                                                                                      |                                                                                                        |                                                                                                                                                                                               |                                                                                                      |
|-------------------------------------------------------------------------------------------------|--------------------------------------------------------------------------------------------------------------------------------------------------|------------------------------------------------------------------------------------------------------------------------------------------------------|--------------------------------------------------------------------------------------------------------|-----------------------------------------------------------------------------------------------------------------------------------------------------------------------------------------------|------------------------------------------------------------------------------------------------------|
| Mount Sinai School of Medicine                                                                  | phenotyping algorithms<br>Develop and implement secure prototype Biobank-EMR genomic data interface and EMR-enabled genomic CDS in clinical care | providers<br>Develop phenotyping algorithms for chronic kidney disease and its progression                                                           | Expand GWAS for cardiovascular and renal phenotypes across minority populations                        | Implement novel solutions incorporating genomic results with EMR                                                                                                                              | Explore innovative approaches for community-participatory education and research in genomic medicine |
| Northwestern University                                                                         | Expand development of phenotype algorithms and detection of new genomic associations                                                             | Consult with physicians and patients regarding the utility of real world examples of clinically relevant genotypes and to inform clinical activities | Develop technical approaches for integrating genetic variant data into the EMR                         | Evaluate impact of key translational elements (e.g. regulatory barriers, EMR CDS tools, and provider and patient education) and disseminate lessons learned and best practice recommendations |                                                                                                      |
| Vanderbilt University                                                                           | Accelerate development of phenotype algorithms                                                                                                   | Identify combinations of genotypes highly predictive of disease or drug response outcomes                                                            | Study patient perspectives of genetic testing to guide drug prescribing                                | Develop tools to maximize sharing of genomic information while preserving privacy                                                                                                             |                                                                                                      |
| Coordinating Center Vanderbilt University with subcontract to the Pennsylvania State University | Facilitate communication between eMERGE sites and coordinate in-person Steering Committee meetings                                               | Provide project management and administrative support for all workgroups and ESP                                                                     | Provide leadership in advancement of electronic phenotyping, genomic data management, and data privacy | Develop and maintain web portal (www.gwas.org)                                                                                                                                                | Provide organizational dashboards with site-specific and network progress towards goals              |

AAA, abdominal aortic aneurysm; ADHD, attention deficit hyperactivity disorder; CDS, Clinical Decision Support; CHD, coronary heart disease; CHF, chronic heart failure; EMR, electronic medical records; ESP, external scientific panel; GERD, gastroesophageal reflux disease; GWAS, genome-wide association study; PheWAS, phenome-wide association study; VTE, venous thromboembolism.  
For details on biorepositories and EMR, see Table 1 in the main section.
