# Supplementary material
Source: PubMed Central journal article supplement (PMC3835143)
Supplement: gim201372x2.pdf [file gim201372x2.pdf]

**Table S2. eMERGE Phase II Phenotypes**

| Phenotype                                                                            | Site         |                            |
|--------------------------------------------------------------------------------------|--------------|----------------------------|
|                                                                                      | Primary      | Secondary                  |
| Abdominal aortic aneurysm (AAA)                                                      | Geisinger    | Mayo, Vanderbilt           |
| buGWAS: <i>Clostridium difficile</i>                                                 | Group Health | Northwestern, Vanderbilt   |
| Cardiorespiratory fitness (CRF)                                                      | Mayo         | Geisinger, Vanderbilt      |
| Diabetes/Hypertension-associated Chronic Kidney Disease (CKD)                        | Mount Sinai  | Marshfield, Northwestern   |
| Lower GI (non-syndromic polyps)                                                      | Northwestern | Vanderbilt                 |
| Ocular Hypertension and response to medication                                       | Marshfield   | Geisinger, Group Health    |
| ACEI cough                                                                           | Vanderbilt   | Northwestern, Group Health |
| Lipids                                                                               | CHOP         |                            |
| Childhood Obesity                                                                    | CCHMC & BCH  |                            |
| Extreme Obesity (BMI)                                                                | Geisinger    | Marshfield                 |
| Dose response for lipid lowering agents                                              | Vanderbilt   | Mayo, Mount Sinai          |
| Glaucoma                                                                             | Marshfield   | Geisinger, Group Health    |
| Lower GI (diverticulosis and -itis)                                                  | Northwestern | Marshfield, Vanderbilt     |
| Drug Induced Liver Injury (DILI)                                                     | Mount Sinai  | Marshfield, Mayo           |
| Venous Thromboembolism (VTE)                                                         | Mayo         | Vanderbilt                 |
| buGWAS: onychomycosis ( <i>Tinea unguium</i> )                                       | Group Health | Marshfield                 |
| Autism Spectrum Disorder                                                             | CCHMC & BCH  |                            |
| Childhood Asthma                                                                     | CHOP         |                            |
| buGWAS: shingles ( <i>Varicella zoster</i> )                                         | Group Health | Vanderbilt                 |
| Heart Failure                                                                        | Mayo         | Group Health               |
| Rapid renal decline in Diabetes/Hypertension-associated Chronic Kidney Disease (CKD) | Mount Sinai  | Marshfield, Mayo           |
| Community acquired MRSA                                                              | Northwestern | Marshfield, Geisinger      |
| AMD or Dry eye & response to medication                                              | Marshfield   | Vanderbilt, Northwestern   |
| Dose Response to lipid lowering agents                                               | Vanderbilt   | Mayo, Mount Sinai          |
| Complications of Obesity -- resolution of diabetes after ROUX-EN-Y                   | Geisinger    | Marshfield                 |
| Upper GI (Peptic ulcer disease)                                                      | Vanderbilt   | Northwestern               |

The phenotyping workgroup of the eMERGE network has as its goal the creation, validation, and execution of phenotype algorithms across eMERGE. Algorithms are adapted and executed at each site to identify cases and controls for each phenotype of interest. These phenotype algorithms typically consist of combinations of billing codes, laboratory and test results, medication exposures, and natural language processing. The algorithms typically take 6-12 months to develop through a process of design and iterative validation. Validation across multiple sites is key to develop a transportable algorithm which can then be used in all eMERGE sites and outside the Network.
